# Supplementary material for: Estimating the contribution of CD4 T cell subset proliferation and differentiation to HIV persistence
Source: PubMed Central journal article supplement (PMC10545742; doi:10.1038/s41467-023-41521-1), 2023-10-02
Supplement: 41467_2023_41521_MOESM1_ESM.pdf [file 41467_2023_41521_MOESM1_ESM.pdf]

# Supplementary Information

## Estimating the contribution of CD4 T cell proliferation and differentiation to HIV persistence

Daniel B Reeves\*, Charline Bacchus-Souffan\*, Mark Fitch, Mohamed Abdel-Mohsen, Rebecca Hoh, Haelee Ahn, Mars Stone, Rick Hecht, Jeff Martin, Steven G Deeks, Marc K Hellerstein, Joseph M McCune, Joshua T Schiffer\*\*, Peter W Hunt\*\*

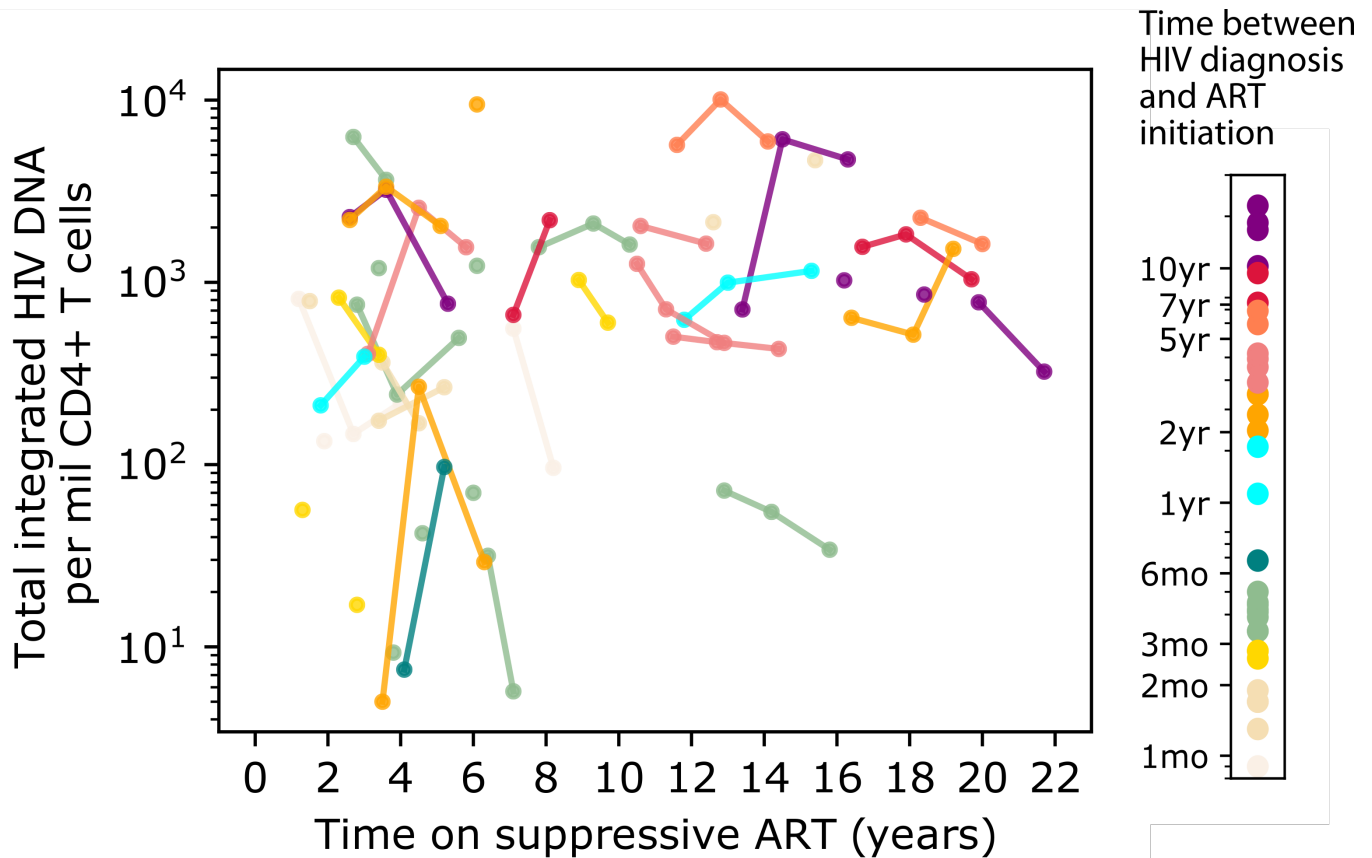

**Supplementary Figure 1. Total longitudinal HIV DNA in 37 PWH, arranged according to time on ART and distinguished by approximate time of HIV infection before initiation of ART.**

HIV DNA per million CD4 T cells (sum of subsets) for each participant illustrating duration of ART and time between HIV diagnosis and ART initiation (color). Neither variable was significantly predictive of total HIV DNA levels.

**Supplementary Table 1. Study participant characteristics.**

All participants are male and had viral loads <40 copies/mL upon study initiation.

| <b>ID</b> | <b>Age decade (years)</b> | <b>Estimated time between HIV acquisition and ART initiation (months)</b> | <b>ART duration at study initiation (years)</b> | <b>CD4 count at study initiation (cells/<math>\mu</math>L blood)</b> | <b>CD4 nadir (cells/<math>\mu</math>L blood)</b> | <b>CD4/CD8 ratio at study initiation</b> |
|-----------|---------------------------|---------------------------------------------------------------------------|-------------------------------------------------|----------------------------------------------------------------------|--------------------------------------------------|------------------------------------------|
| 1         | 40                        | 0.9                                                                       | 1.2                                             | 841                                                                  | 468                                              | 0.9                                      |
| 2         | 60                        | 4.2                                                                       | 2.8                                             | 341                                                                  | 252                                              | 0.7                                      |
| 3         | 30                        | 1.7                                                                       | 1.5                                             | 899                                                                  | 518                                              | 1.5                                      |
| 4         | 30                        | 4.5                                                                       | 3.4                                             | 532                                                                  | 486                                              | 1.3                                      |
| 5         | 50                        | 1.9                                                                       | 3.4                                             | 1163                                                                 | 618                                              | 1.9                                      |
| 6         | 40                        | 4.1                                                                       | 2.7                                             | 637                                                                  | 509                                              | 1.0                                      |
| 7         | 20                        | 1.7                                                                       | 3.5                                             | 787                                                                  | 341                                              | 1.7                                      |
| 8         | 40                        | 2.8                                                                       | 1.3                                             | 445                                                                  | 311                                              | 1.0                                      |
| 9         | 30                        | 5                                                                         | 3.8                                             | 433                                                                  | 251                                              | 1.2                                      |
| 10        | 20                        | 2.6                                                                       | 2.3                                             | 1290                                                                 | 791                                              | 1.4                                      |
| 11        | 30                        | 0.1                                                                       | 1.9                                             | 673                                                                  | 437                                              | 1.0                                      |
| 12        | 30                        | 0.7                                                                       | 7.1                                             | 513                                                                  | 352                                              | 1.2                                      |
| 13        | 50                        | 3.4                                                                       | 12.9                                            | 739                                                                  | 442                                              | 1.3                                      |
| 14        | 40                        | 4.4                                                                       | 6.4                                             | 341                                                                  | 203                                              | 1.0                                      |
| 15        | 50                        | 1.3                                                                       | 12.6                                            | 469                                                                  | 165                                              | 0.8                                      |
| 16        | 30                        | 3.4                                                                       | 7.8                                             | 697                                                                  | 391                                              | 1.1                                      |
| 17        | 40                        | 2.8                                                                       | 8.9                                             | 880                                                                  | 478                                              | 1.1                                      |
| 18        | 30                        | 3.9                                                                       | 4.6                                             | 518                                                                  | 202                                              | 1.2                                      |
| 19        | 50                        | 34.9                                                                      | 4.5                                             | 573                                                                  | 311                                              | 1.2                                      |
| 20        | 30                        | 45.5                                                                      | 3.1                                             | 637                                                                  | 357                                              | 1.1                                      |
| 21        | 30                        | 24.4                                                                      | 3.5                                             | 626                                                                  | 480                                              | 1.3                                      |
| 22        | 30                        | 20.8                                                                      | 1.8                                             | 902                                                                  | 664                                              | 1.1                                      |
| 23        | 20                        | 6.8                                                                       | 4.1                                             | 582                                                                  | 229                                              | 2.3                                      |
| 24        | 50                        | 187.7                                                                     | 2.6                                             | 432                                                                  | 335                                              | 1.7                                      |
| 25        | 50                        | 34.8                                                                      | 2.6                                             | 468                                                                  | 393                                              | 1.0                                      |
| 26        | 60                        | 85.5                                                                      | 16.7                                            | 383                                                                  | 132                                              | 1.1                                      |
| 27        | 50                        | 222                                                                       | 13.4                                            | 377                                                                  | 300                                              | 0.6                                      |
| 28        | 60                        | 122.5                                                                     | 18.8                                            | 687                                                                  | 13                                               | 1.1                                      |
| 29        | 50                        | 39.1                                                                      | 11.5                                            | 523                                                                  | 2                                                | 0.7                                      |
| 30        | 50                        | 69.4                                                                      | 17.0                                            | 747                                                                  | 10                                               | 0.4                                      |
| 31        | 50                        | 13.1                                                                      | 11.8                                            | 486                                                                  | 280                                              | 1.3                                      |
| 32        | 60                        | 114.5                                                                     | 7.1                                             | 437                                                                  | 54                                               | 1.4                                      |
| 33        | 60                        | 49.3                                                                      | 10.6                                            | 570                                                                  | 207                                              | 0.8                                      |
| 34        | 60                        | 28.5                                                                      | 16.4                                            | 486                                                                  | 96                                               | 1.2                                      |
| 35        | 50                        | 79                                                                        | 11.6                                            | 613                                                                  | 99                                               | 1.0                                      |
| 36        | 60                        | 175                                                                       | 16.2                                            | 667                                                                  | 400                                              | 1.2                                      |
| 37        | 40                        | 51.9                                                                      | 10.5                                            | 474                                                                  | 129                                              | 0.6                                      |

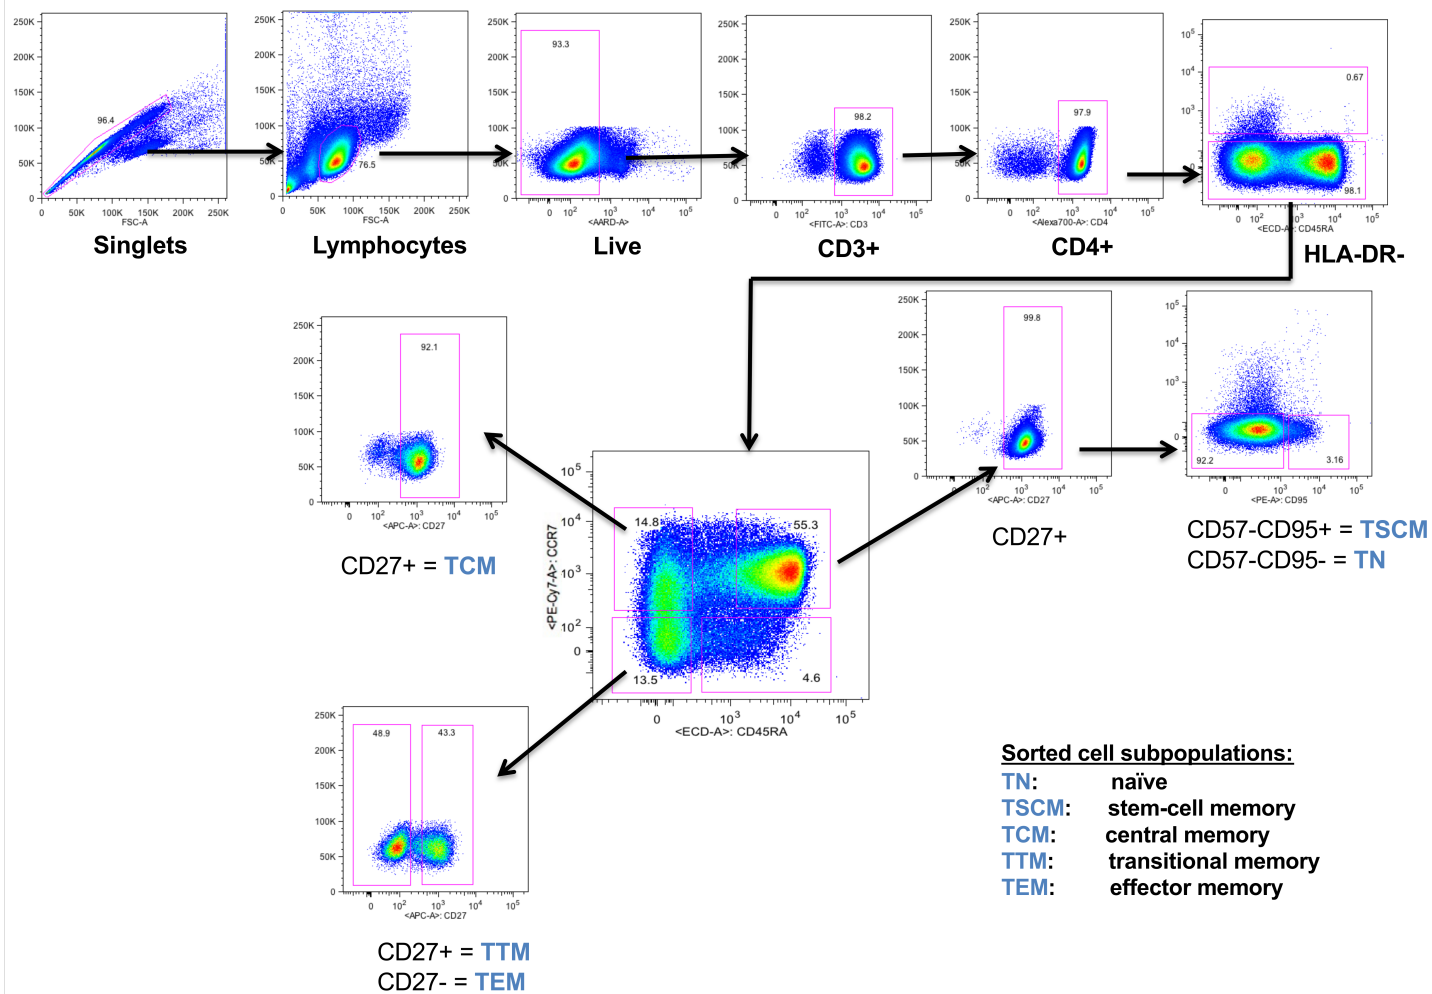

**Supplementary Figure 2. Cell sorting strategy for CD4 T cell subsets.** Representative flow plots from a single participant in the study showing the sorting strategy used to isolate the various CD4 T cell subsets. Once resting (HLA-DR-) CD4+ T cells were selected, we used the extracellular markers CD45RA, CCR7, CD27, CD57 and CD95 to distinguish the following cell subsets: T<sub>N</sub>, T<sub>SCM</sub>, T<sub>CM</sub>, T<sub>TM</sub> and T<sub>EM</sub>. The terminally-differentiated (T<sub>TD</sub>) population (CD45RA+ CCR7-, bottom right pink box in central panel) was not reported here as variable contamination of T<sub>N</sub> was found in this population as described previously<sup>23</sup>.

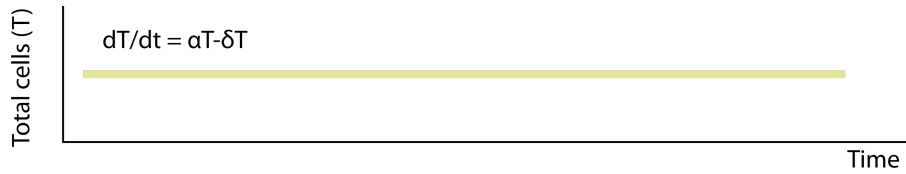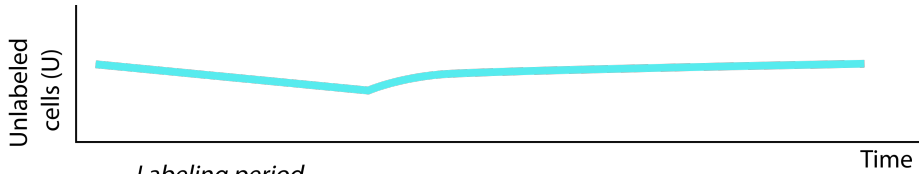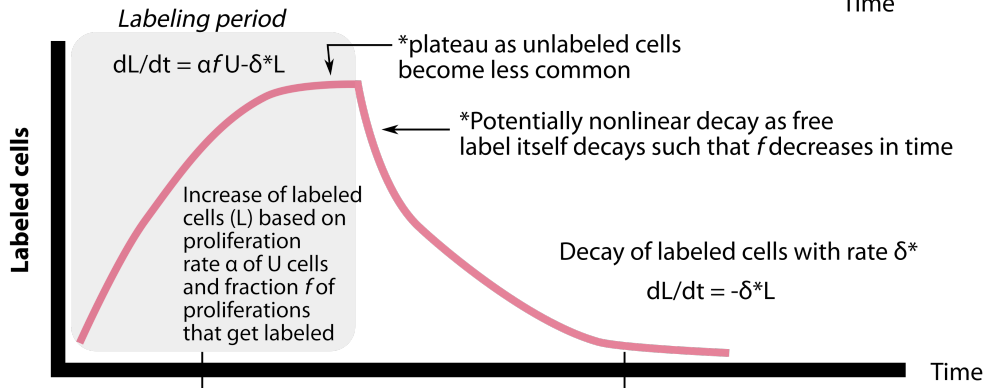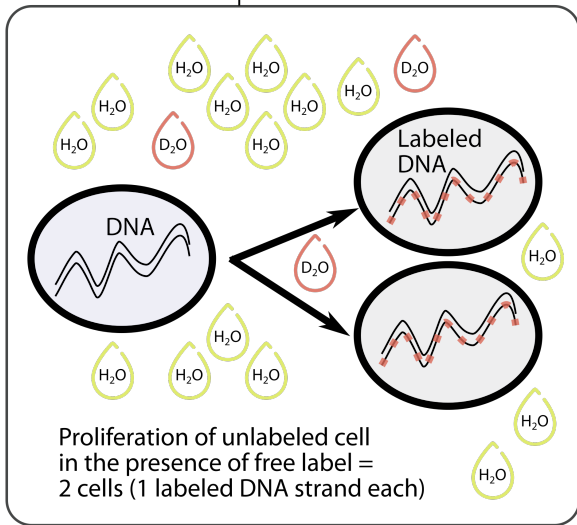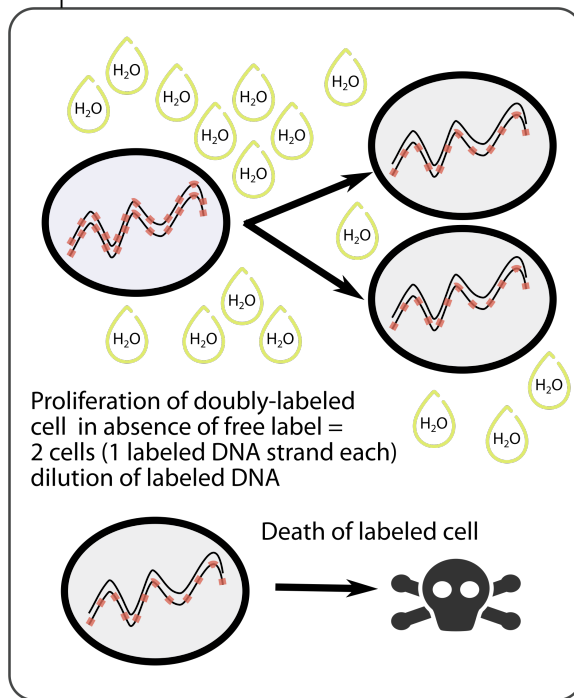

**Other mechanisms potentially contributing to turnover rate**

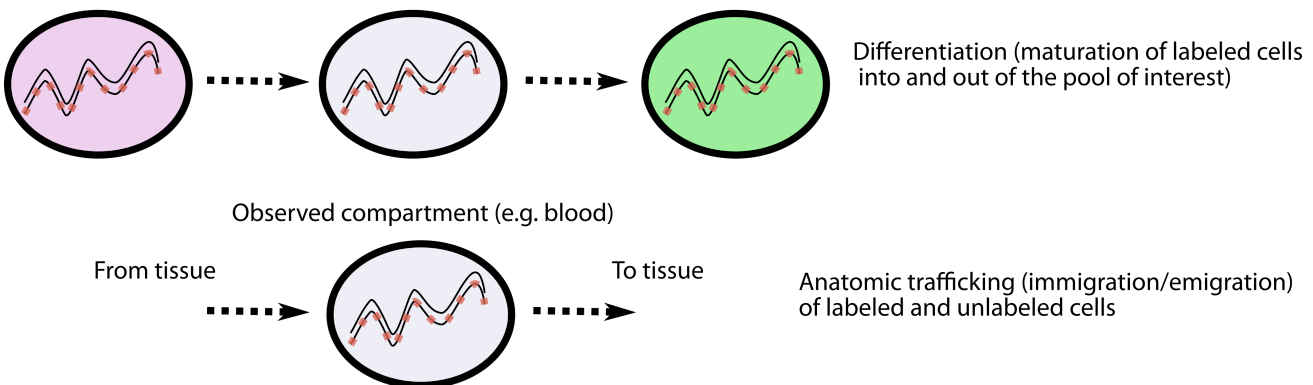

**Supplementary Figure 3. Schematic and cartoon of labeling study.** The top three cartoon graphics illustrate time-varying levels of total cells (yellow), unlabeled cells (blue), and labeled cells (red). The fraction of labeled cells  $L/T$  is used to infer turnover rate. Several assumptions are made. First, total cells in each subset are assumed to stay constant over the 45-day labeling period. Unlabeled cells may decrease slightly (3% in our study), so this is approximately negligible in the dynamic system. The remaining graphics illustrate cell processes occurring in a time slice during labeling (left) and after labeling ceases (right). During the labeling period, deuterium --  $D_2O$  (red drops) vs normal  $H_2O$  (yellow drops) -- is available and can be incorporated into the genome of dividing cells to make labeled DNA. A single unlabeled cell dividing results in 2 cells carrying a single labeled DNA strand each. After administration ceases, proliferation of cells then results in new cells without deuterium, and this coupled with the clearance of labeled cells results in a dilution of the labeled fraction. A doubly labeled cell dividing results in 2 cells carrying a single labeled DNA strand each. There are other possible mechanisms (dashed arrows) that could potentially contribute to turnover kinetics, including differentiation of already labeled cells into a certain subset, or differentiation out of the subset of interest. In addition, immigration/migration are assumed to be balanced and ignorable, but this theoretically could influence dynamics.

**A** Subset infection frequency  
(HIV DNA copies per mil subset cell)  
Spearman correlation coefficient

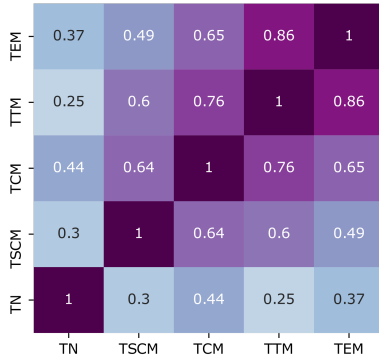

**B** Subset HIV DNA  
(HIV DNA copies per mil total CD4)  
Spearman correlation coefficient

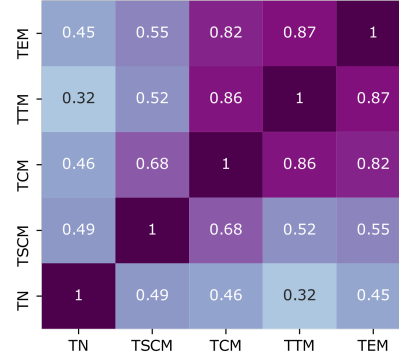

**C** Normalized subset infection frequency

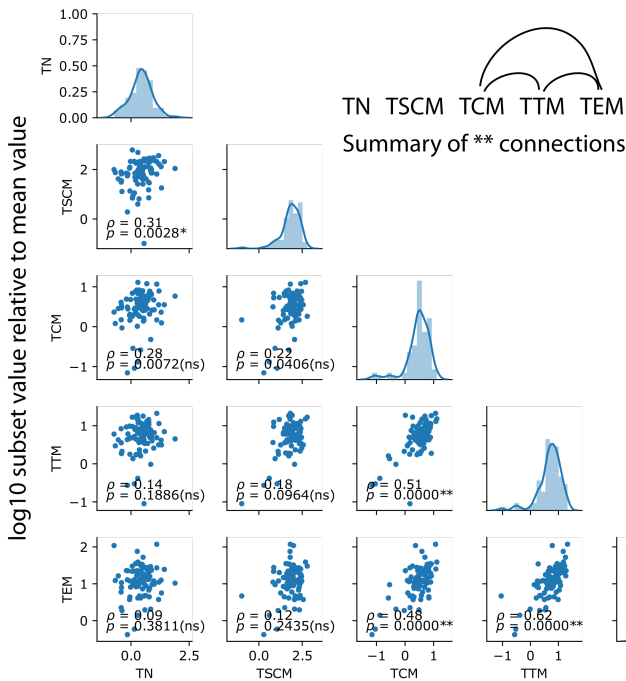

**D** Normalized subset HIV DNA

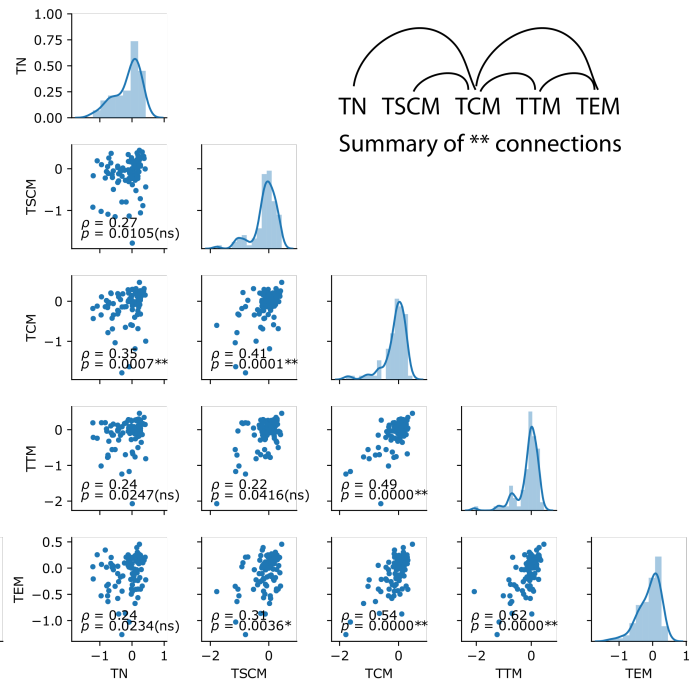

**Supplementary Figure 4. Correlations among subset HIV DNA levels across and within individuals.** A) Spearman correlations between the time-averaged values of subset frequency over time  $\langle \mathbf{f}_X \rangle_t$ . B) Spearman correlations between the time-averaged values of the subset HIV DNA  $\langle \mathbf{H}_X \rangle_t$ . C) Spearman correlations between normalized subset frequency data (normalized to time-averaged values  $\hat{\mathbf{f}}_X(\mathbf{t}) = \mathbf{f}_X(\mathbf{t}) / \langle \mathbf{f}_X \rangle_t$  across all individuals and time points (for instance, correlation between TCM and TEM follows  $\hat{\mathbf{f}}_{CM}(\mathbf{t}) \sim \hat{\mathbf{f}}_{EM}(\mathbf{t})$ ). D) Spearman correlations between normalized subset HIV DNA levels across all individuals and time points (also normalized to time-averaged values). For C and D, data are visualized on log10 scale, and plot insets provide correlation coefficients ( $\rho$ ) and p-values. P-values were characterized as not significant (ns) if  $p > 0.005$ , significant (\*) if  $p < 0.005$ , and strongly significant (\*\*) if  $p < 0.0001$  based on a Bonferroni correction due to 10 comparisons in each of A and B. Strongly significant correlations are summarized for each data type in the line diagram to the top right of the scatter plots. TCM, TTM, and TEM were significantly related for both data types.

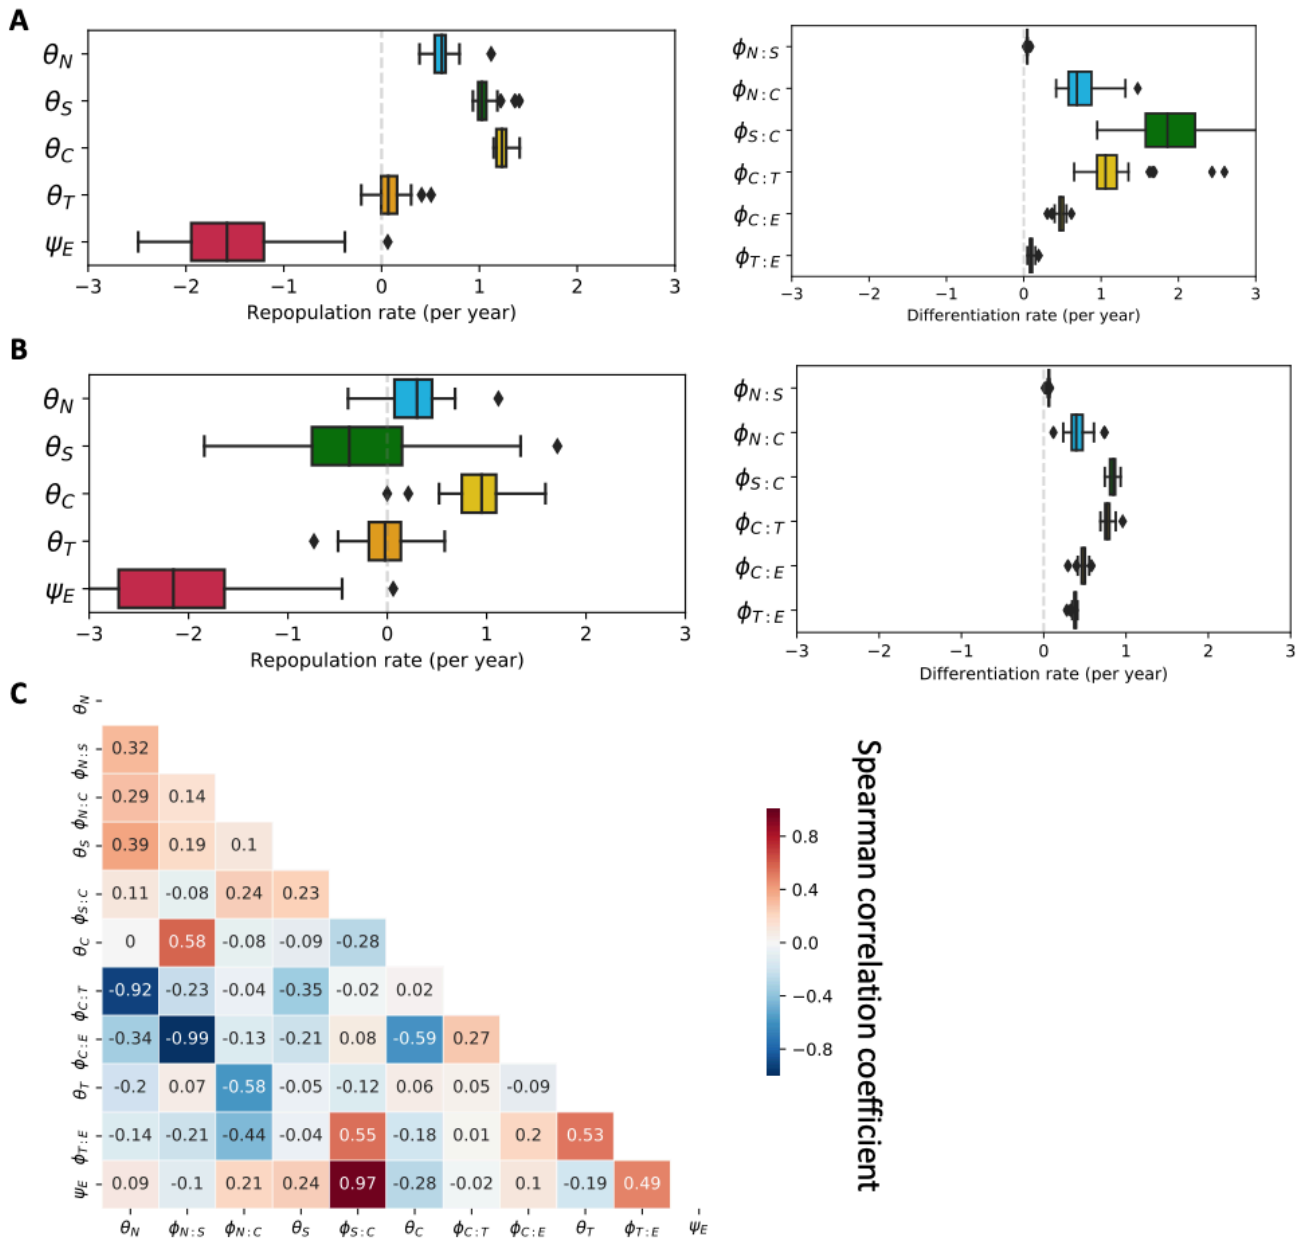

**Supplementary Figure 5. Estimated parameter values from the best model.** Based on the observation of very high differentiation rates (>100% HIV DNA per year), we constrained the parameter space available for the fitting algorithm. A) The initial values from the top ranked model. B) The constrained values from the second best model, but with more biologically plausible values. Box plots indicate median (center), interquartile range (box) and 1.5x interquartile range (fliers), outliers are denoted by diamond. C) Correlations (Spearman coefficient) among estimates of the parameters across all individuals.

**Supplementary Table 2. Population parameters, variation across individuals, and error of estimate for best model.** Note model noise is included with the equation  $y_i = T_i + b_i T_i \epsilon$  where  $\epsilon$  is a normal distribution with zero mean and unit variance and  $T_i$  is the level of subset  $i$ .

| Category [unit]                                | Symbol          | Population parameter value | Residual squared error of estimate (%) | Std deviation of participant values |
|------------------------------------------------|-----------------|----------------------------|----------------------------------------|-------------------------------------|
| Initial condition                              | $H_N(0)$        | 29.03                      | 28                                     | 1.63                                |
| [HIV DNA per mil CD4+ T cells]                 | $H_S(0)$        | 2.37                       | 27                                     | 1.62                                |
|                                                | $H_C(0)$        | 163.70                     | 29                                     | 1.70                                |
|                                                | $H_T(0)$        | 89.80                      | 28                                     | 1.67                                |
|                                                | $H_E(0)$        | 65.81                      | 30                                     | 1.80                                |
| Net proliferation-death "net" rate [1/year]    | $\theta_N$      | 0.30                       | 95                                     | 0.44                                |
|                                                | $\theta_S$      | -0.40                      | 270                                    | 1.03                                |
|                                                | $\theta_C$      | 0.94                       | 33                                     | 0.45                                |
|                                                | $\theta_T$      | -0.07                      | 171                                    | 0.40                                |
| TEM net + differentiation out rate [1/year]    | $\psi_E$        | -2.23                      | 28                                     | 1.23                                |
| Differentiation rate [1/year]                  | $\varphi_{N:S}$ | 0.06                       | 22                                     | 0.02                                |
|                                                | $\varphi_{N:C}$ | 0.40                       | 67                                     | 0.26                                |
|                                                | $\varphi_{S:C}$ | 0.85                       | 123                                    | 0.25                                |
|                                                | $\varphi_{C:T}$ | 0.77                       | 25                                     | 0.16                                |
|                                                | $\varphi_{C:E}$ | 0.48                       | 41                                     | 0.14                                |
|                                                | $\varphi_{T:E}$ | 0.38                       | 71                                     | 0.13                                |
| Estimated variation of data (noise) [unitless] | $b_N$           | 0.62                       | 14                                     |                                     |
|                                                | $b_S$           | 0.35                       | 21                                     |                                     |
|                                                | $b_C$           | 0.51                       | 13                                     |                                     |
|                                                | $b_T$           | 0.42                       | 17                                     |                                     |
|                                                | $b_E$           | 0.43                       | 19                                     |                                     |



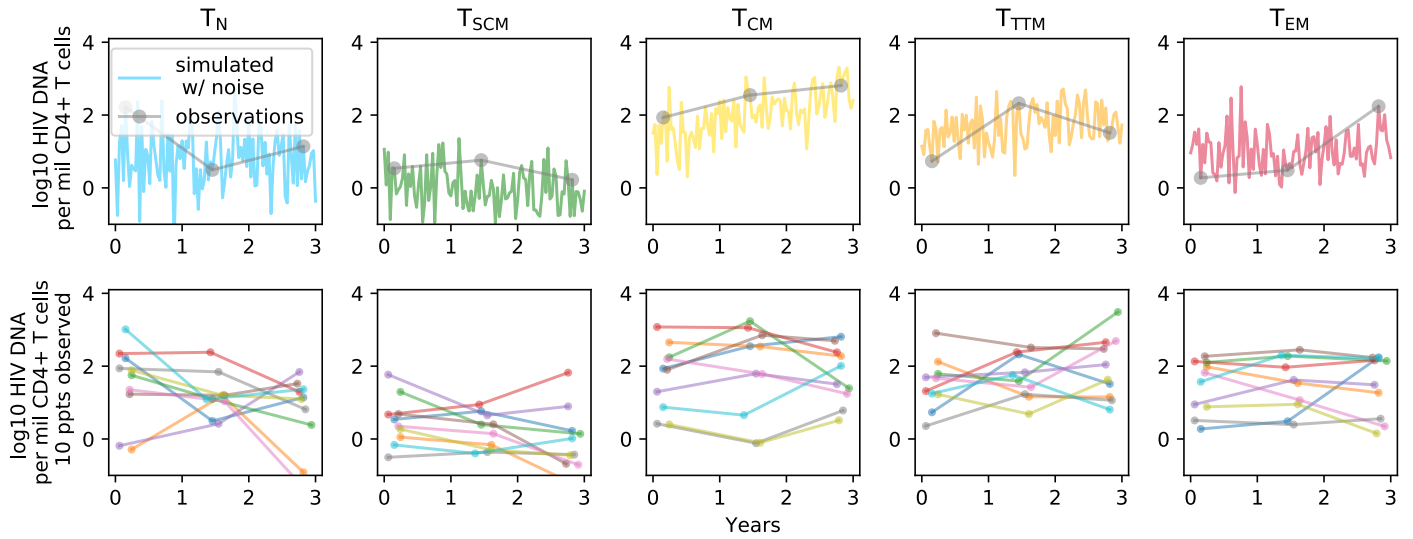

**Supplementary Figure 6. Simulating linear differentiation model to assess model selection after sampling.** Top: A single participant example of simulated data from the model with linear differentiation (and noise) for each subset (colored jagged lines) and random samples around 0, 1.5, and 3 years (with 10 weeks of variability). Bottom: 10 example participant observed trajectories (colors) for each subset above to illustrate heterogeneity of sparsely sampled data.

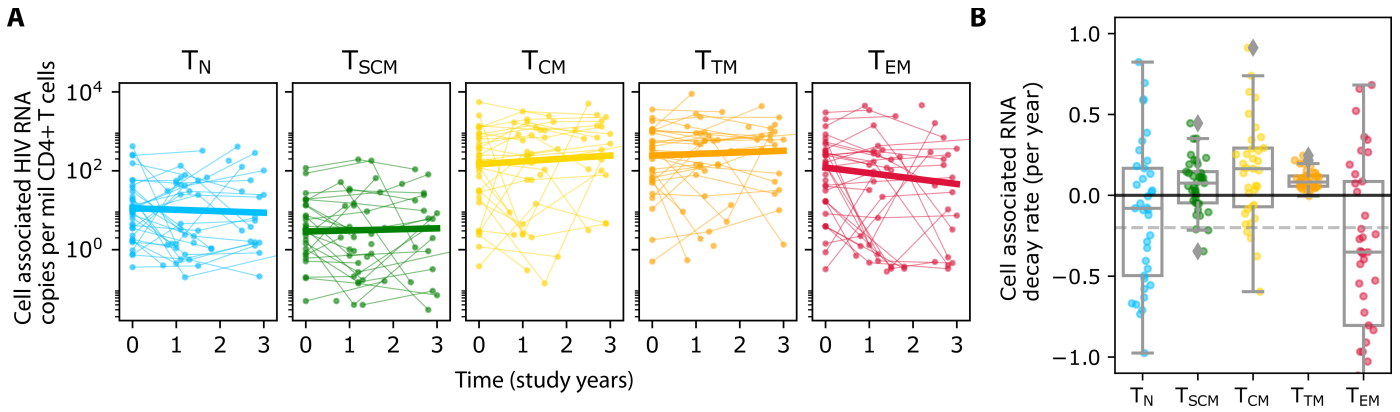

**Supplementary Figure 7. Cell-associated HIV RNA kinetics.** A) Levels in each participant, dots are observations and lines connect dots to help visualize individual trajectories. Solid line is best fit population model. B) Decay rate for each subset, dots indicate values for each participant. Box plots indicate median (center), interquartile range (box) and 1.5x interquartile range (fliers), outliers are denoted by diamond.
