# Supplementary material for: Estimating the contribution of CD4 T cell subset proliferation and differentiation to HIV persistence
Source: PubMed Central journal article supplement (PMC10545742; doi:10.1038/s41467-023-41521-1), 2023-10-02
Supplement: 41467_2023_41521_MOESM3_ESM.pdf [file 41467_2023_41521_MOESM3_ESM.pdf]

## **Description of Additional Supplementary Files Document**

**Supplementary Movie 1. Model simulation.** Simulation of best model with population parameters for a typical 1 day, 1 week, 1 month, and 1 year of ART. Populations of integrated HIV DNA in each subset constantly proliferate, die, and differentiate into other subsets. However, net levels in each subset remain mostly constant, with a slight decay in more mature subsets that can only be seen over years of ART.

**Supplementary Data 1:** Individual initial conditions and rates/parameter values for each participant taken from the pNLME mode output by Monolix. Can be used to resimulate any individual trajectory.
